# Supplementary material for: Breed and Feeding System Impact the Bioactive Anti-Inflammatory Properties of Bovine Milk
Source: MDPI journal article supplement (doi:10.3390/ijms231911088), 2022-09-21
Supplement: s1 [file s1]

# Breed and feeding system impact the bioactive anti-inflammatory properties of bovine milk

Angela Salzano <sup>1§</sup>, Maria Chiara Di Meo <sup>2§</sup>, Nunzia D'Onofrio <sup>3</sup>, Giovanna Bifulco <sup>1</sup>, Alessio Cotticelli <sup>1\*</sup>, Francesca Licitra <sup>4</sup>, Antonio Iraci Fuintino <sup>5</sup>, Giuseppe Cascone <sup>4</sup>, Maria Luisa Balestrieri <sup>3</sup>, Ettore Varricchio <sup>2</sup> and Giuseppe Campanile <sup>1</sup>

<sup>1</sup> Department of Veterinary Medicine and Animal Productions, University of Naples Federico II, 80137 Naples, Italy

<sup>2</sup> Department of Science and Technology, University of Sannio, 82100 Benevento, Italy

<sup>3</sup> Department of Precision Medicine, University of Campania Luigi Vanvitelli, 80138 Naples, Italy

<sup>4</sup> Istituto Zooprofilattico Sperimentale della Sicilia "A. Mirri", 90129 Palermo, Italy

<sup>5</sup> Provincial Public Health Authority of Ragusa, 97100 Ragusa, Italy

§ The authors contributed equally to this work.

\* Correspondence: [alessio.cotticelli@unina.it](mailto:alessio.cotticelli@unina.it)

## SUPPLEMENTARY MATERIALS

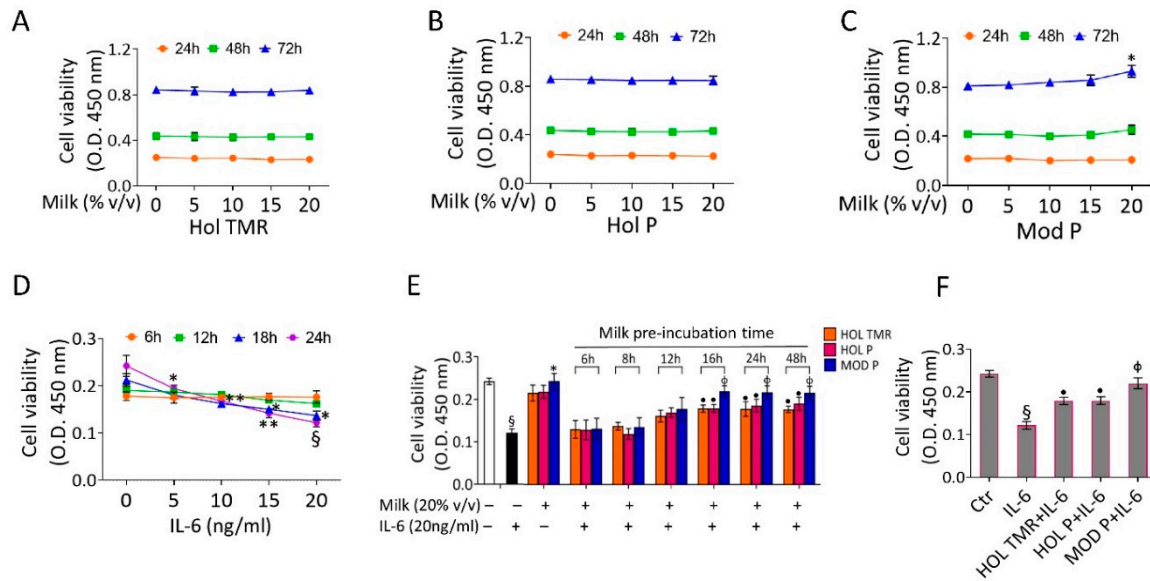

**Figure S1.** Milk effects on EC viability. EC viability after exposure to different volumes (0-20% v/v) of (A) Hol TMR, (B) Hol P, and (C) Mod P milk up to 72h or to (D) different concentrations (0-20 ng/ml) of IL-6 up to 24h. (E) Time-course experiments of milk pre-incubation times before starting inflammatory induction with IL-6 (20 ng/ml) and (F) EC pretreated for 16h with milk (20% v/v) before starting stimulation for 24h with IL-6 (20 ng/ml). Cell viability was assessed by Cell Counting Kit-8 assay (Donjindo Molecular Technologies) and reported as optical density (O.D.) values. Control cells (0 or Ctr) were treated with the corresponding highest volume of HBSS-10 mM Hepes. \* $p < 0.05$  vs 0 mM or Ctr; \*\* $p < 0.01$  vs 0 mM or Ctr; § $p < 0.001$  vs 0 mM or Ctr; • $p < 0.05$  vs IL-6; Φ $p < 0.01$  vs IL-6.

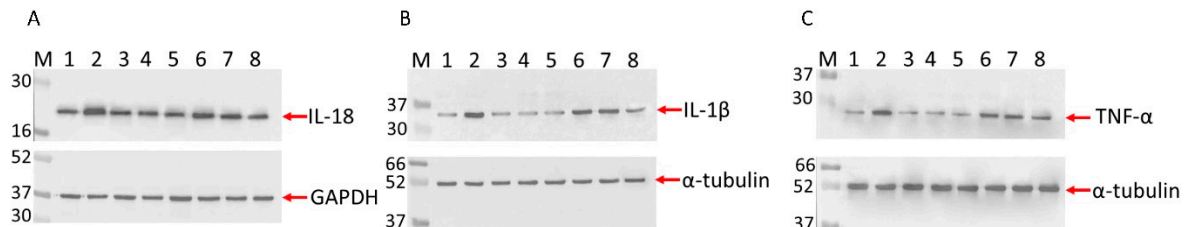

**Figure S2.** Cytokine levels. Representative cropped blots of (A) IL-18, (B) IL-1β and (C) TNF-α immunoblotting analysis in EC treated with Hol TMR, Hol P, and Mod P milk (20% v/v) for 72h, IL-6 (20 ng/ml) for 24h or pretreated for 16h with milks before starting stimulation for 24h with IL-6. Control cells (Ctr) were treated with the corresponding highest volume of HBSS-10 mM Hepes. Lane 1 = Ctr; lane 2 = IL-6; lane 3 = Hol TMR milk; lane 4 = Hol P milk; lane 5 = Mod P milk; lane 6 = Hol TMR+IL-6; lane 7 = Hol P+IL-6; lane 8 = Mod P+IL-6; M = weight markers (G623, Applied Biological Materials Inc.). Protein expression was calculated, after normalization with α-tubulin or GAPDH as internal control, with IMAGEJ software.

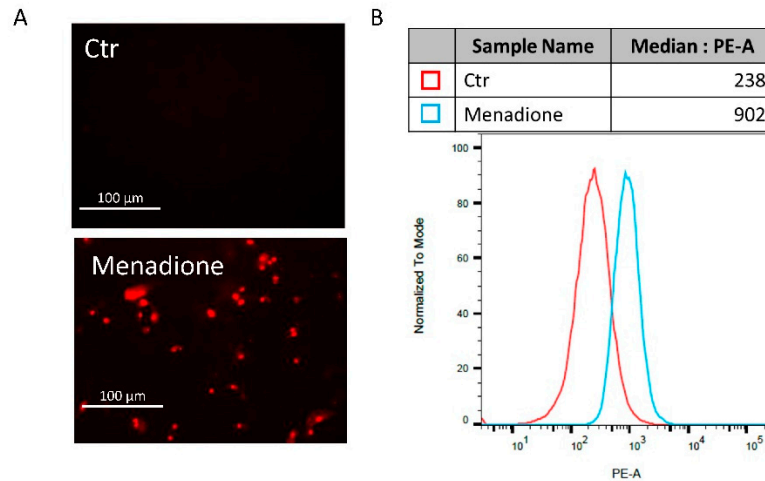

**Figure S3.** Oxidative stress controls. (A) Representative images and (B) cytometer analysis, expressed as red fluorescence median, of mitochondrial ROS detection in EC treated for 1h with 50  $\mu$ M menadione, the ROS inducer, or with the corresponding volume of HBSS-10 mM Hepes (Ctr) and stained with MitoSOX Red probe. Scale bar= 100 $\mu$ m.

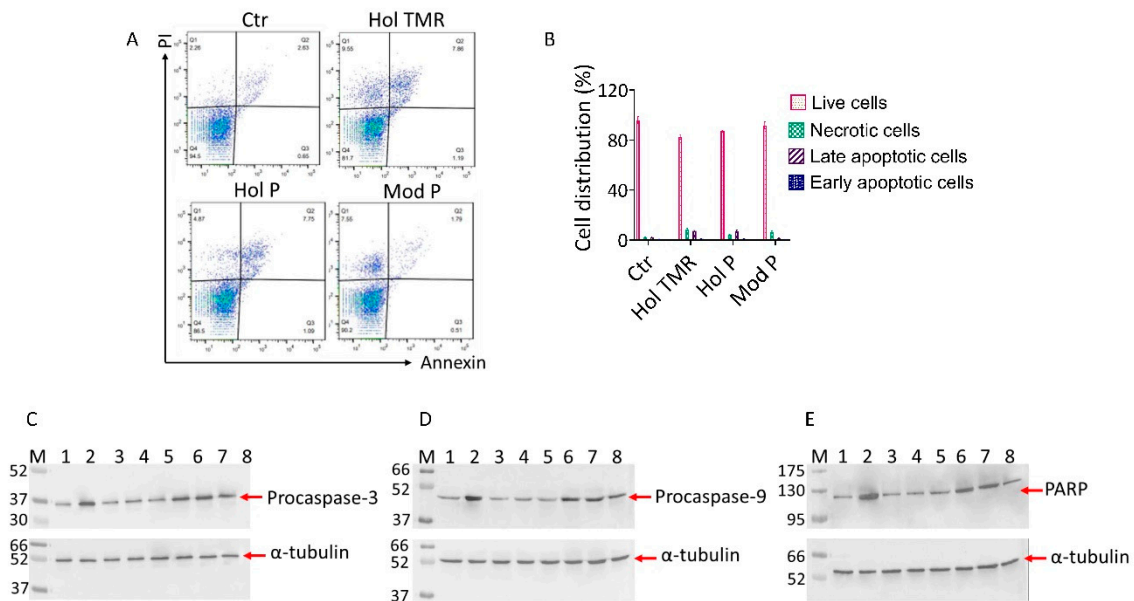

**Figure S4.** Milk effects on apoptosis. (A) Representative dot plots and (B) analysis of Annexin V-FITC and Propidium Iodide (PI)-stained EC treated with Hol TMR, Hol P, and Mod P milk (20% v/v) for 72h or with the corresponding volume of HBSS-10 mM Hepes (Ctr). Lower left, viable cells; upper left, necrotic cells; lower right, early apoptotic cells; upper right, late apoptotic cells. Representative cropped blots of (C) procaspase-3, (D) procaspase-9 and (E) PARP immunoblotting analysis in EC treated with Hol TMR, Hol P, and Mod P milk (20% v/v) for 72h, IL-6 (20 ng/ml) for 24h or pretreated for 16h with milks before starting stimulation for 24h with IL-6. Control cells (Ctr) were treated with the corresponding highest volume of HBSS-10 mM Hepes. Lane 1 = Ctr; lane 2 = IL-6; lane 3 = Hol TMR milk; lane 4 = Hol P milk; lane 5 = Mod P milk; lane 6 = Hol TMR+IL-6; lane 7 = Hol P+IL-6; lane 8 = Mod P+IL-6; M = weight markers (G623, Applied Biological Materials Inc.). Protein expression was calculated, after normalization with  $\alpha$ -tubulin as internal control, with IMAGEJ software.

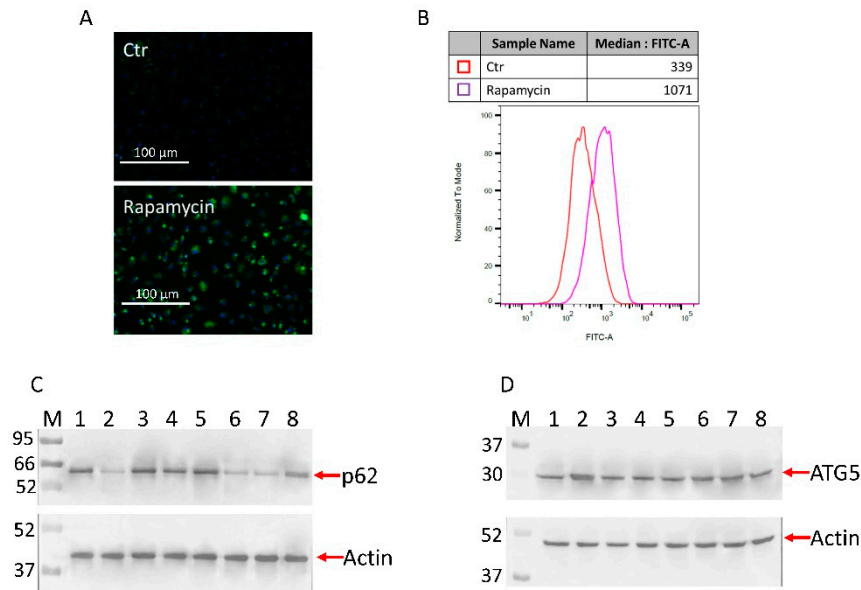

**Figure S5.** Milk effects on autophagy. (A) Representative images and (B) cytometer analysis, expressed as green fluorescence median, of autophagy detection in EC treated for 16h with 1  $\mu$ M rapamycin, autophagy inducer, or with the corresponding volume of HBSS-10 mM Hepes (Ctr) and stained with Green detection reagent. Scale bar= 100 $\mu$ m. Representative cropped blots of (C) p62 and (D) ATG5 immunoblotting analysis in EC treated with Hol TMR, Hol P, and Mod P milk (20% v/v) for 72h, IL-6 (20 ng/ml) for 24h or pretreated for 16h with milks before starting stimulation for 24h with IL-6. Control cells (Ctr) were treated with the corresponding highest volume of HBSS-10 mM Hepes. Lane 1 = Ctr; lane 2 = IL-6; lane 3 = Hol TMR milk; lane 4 = Hol P milk; lane 5 = Mod P milk; lane 6 = Hol TMR+IL-6; lane 7 = Hol P+IL-6; lane 8 = Mod P+IL-6; M = weight markers (G623, Applied Biological Materials Inc.). Protein expression was calculated, after normalization with actin as internal control, with IMAGEJ software.
